# Supplementary material
Source: PubMed Central journal article supplement (PMC2890214)

Figure S1

CID-MS<sup>2</sup> spectrum of the disulfide-linked peptide (derived from Lys-C plus trypsin plus Glu-C digestion) with an O-linked fucose and unassigned cysteine paired with a glutathione

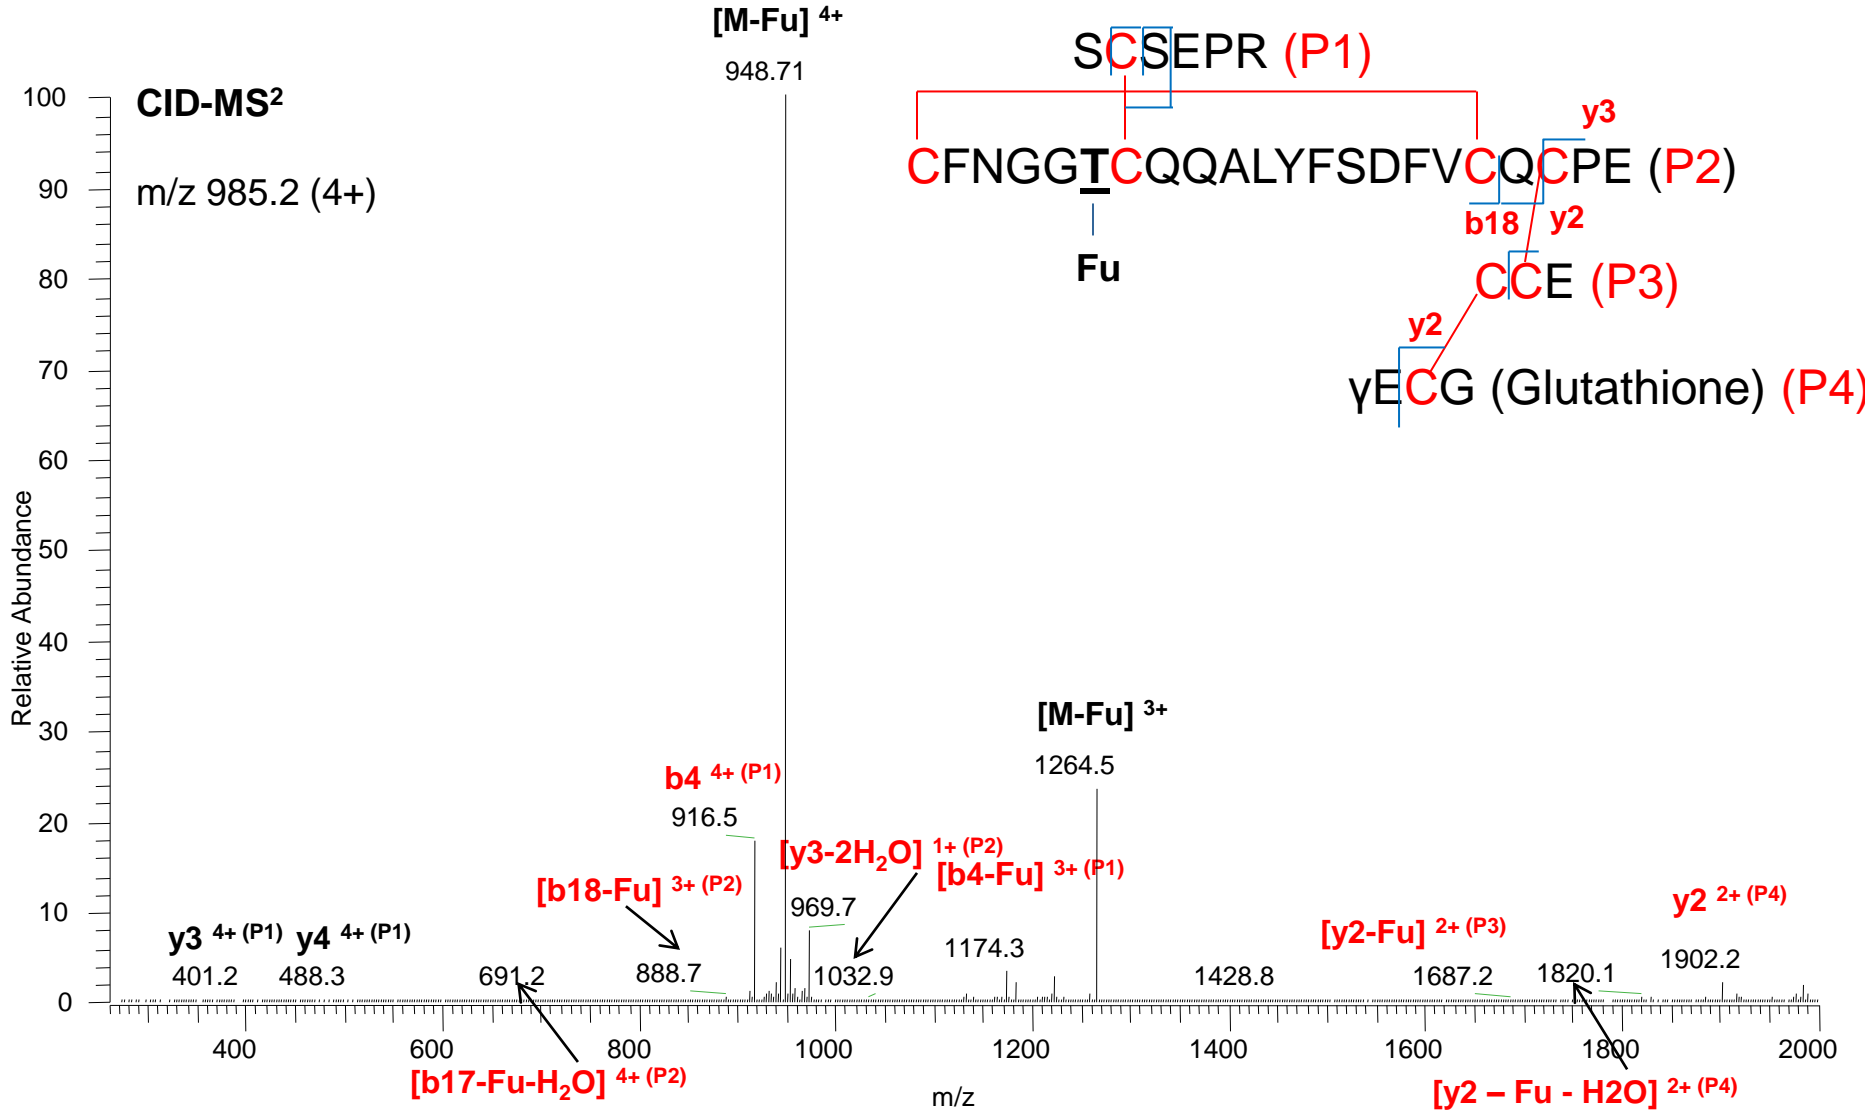

Figure S2

CID-MS<sup>2</sup> spectrum of the disulfide-linked peptide (derived from Lys-C plus trypsin plus Glu-C digestion) with an O-linked fucose and unassigned cysteine paired with a cysteine

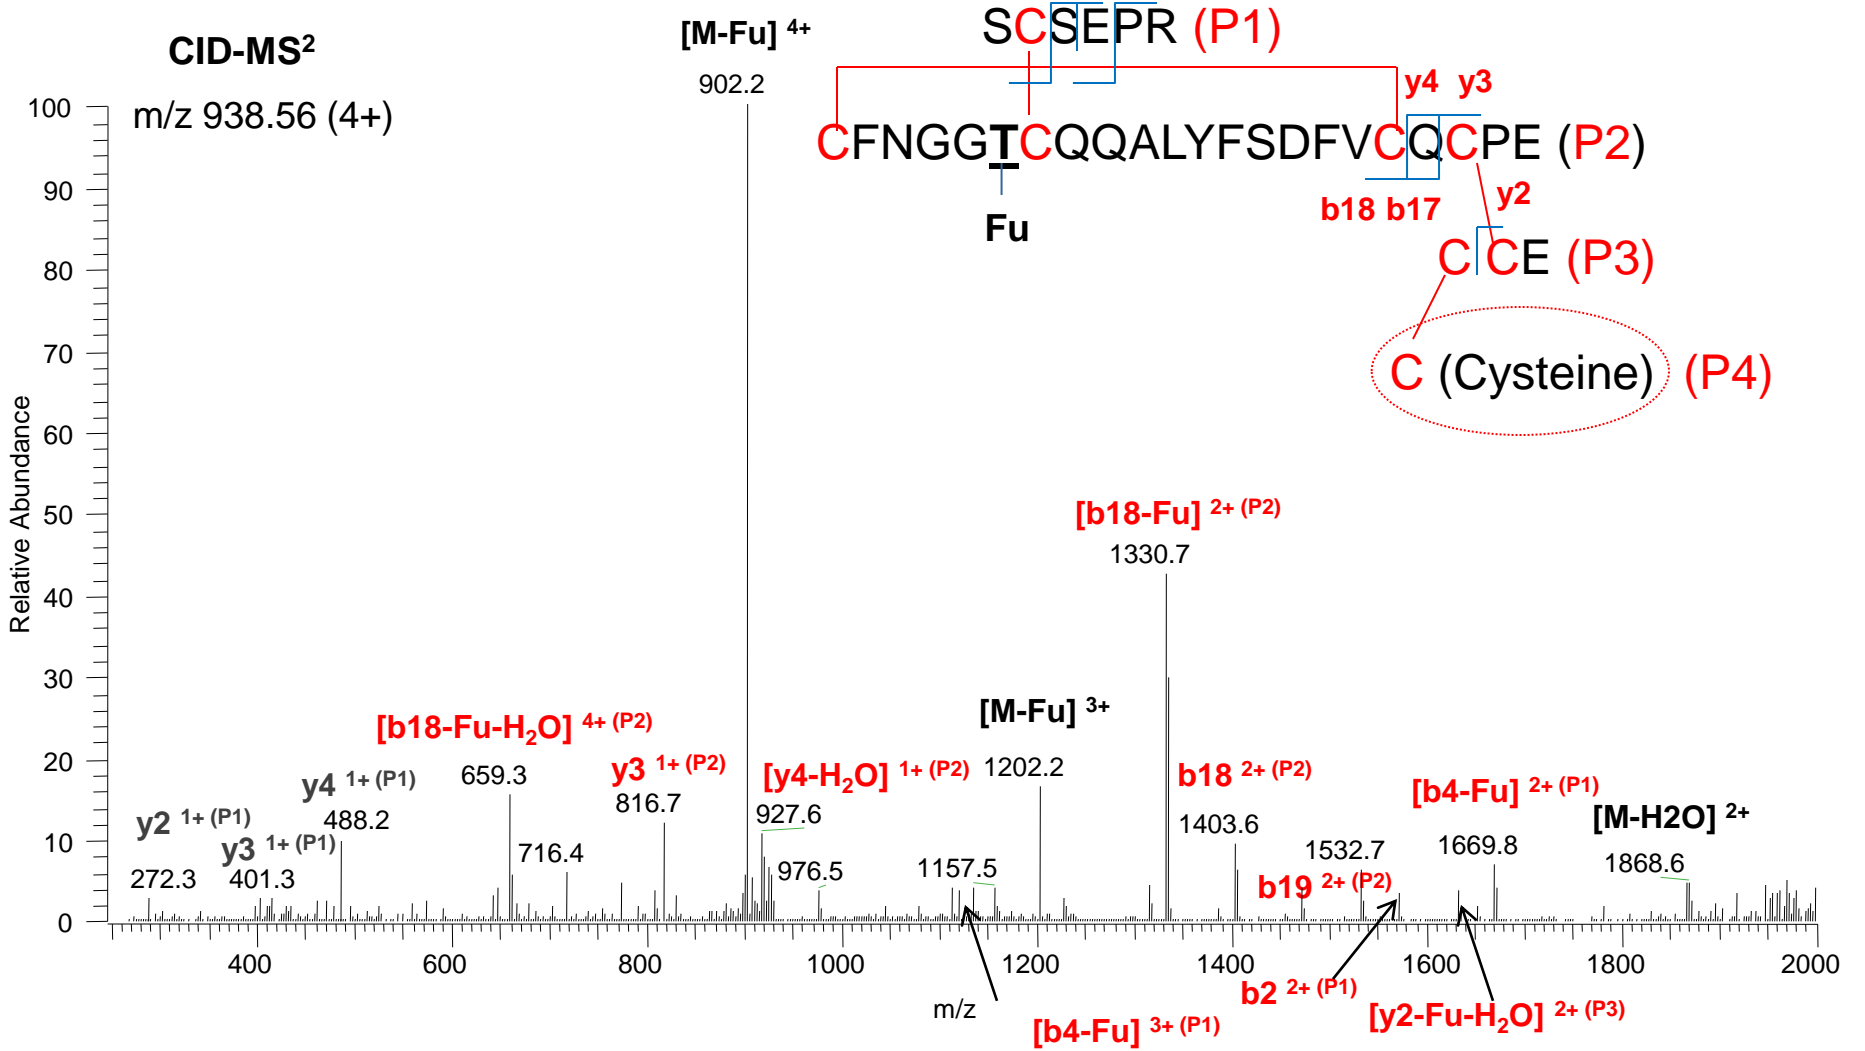

Figure S3A  
 CID-MS<sup>2</sup> spectrum of the disulfide-linked (Lys-C plus trypsin) peptide with an N-linked glycan

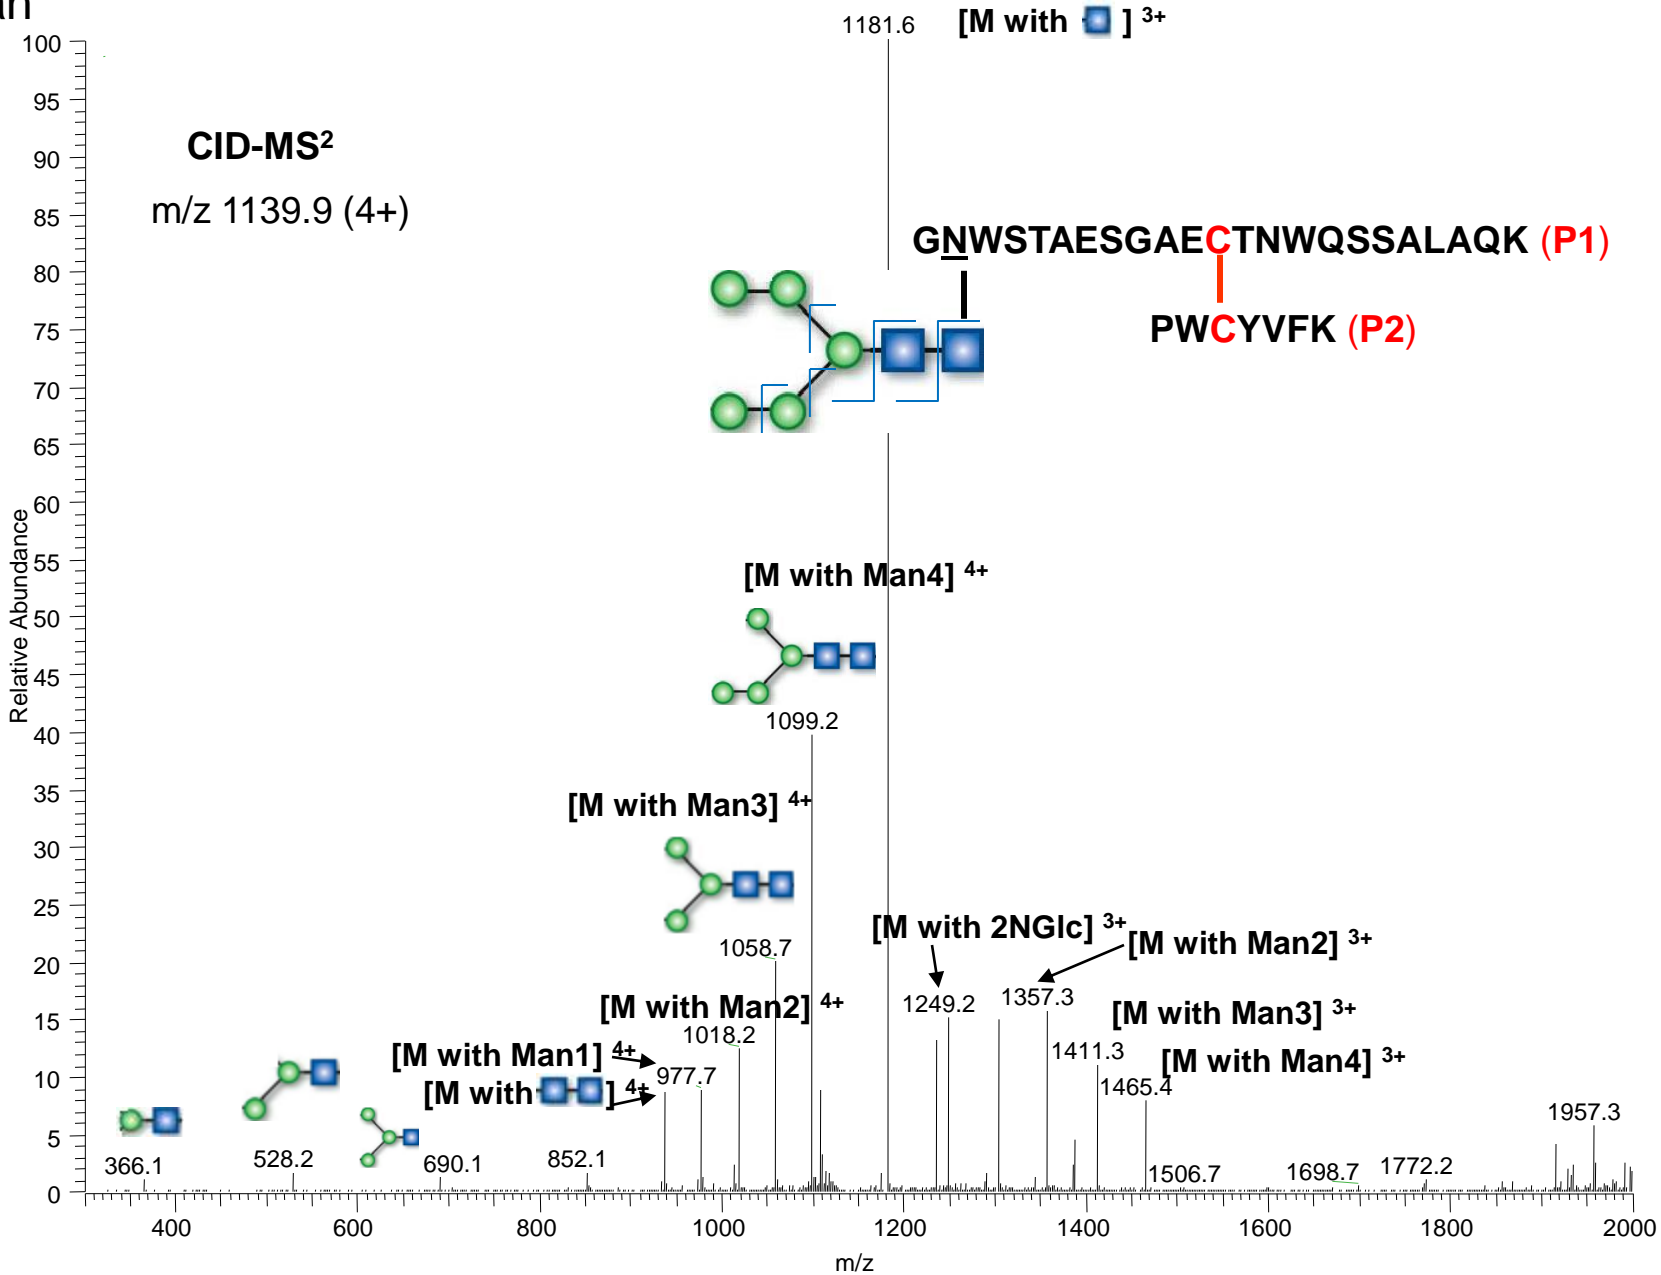

Figure S3B

# ETD-MS<sup>2</sup> spectrum of the disulfide-linked (Lys-C plus trypsin) peptide with an N-linked glycan

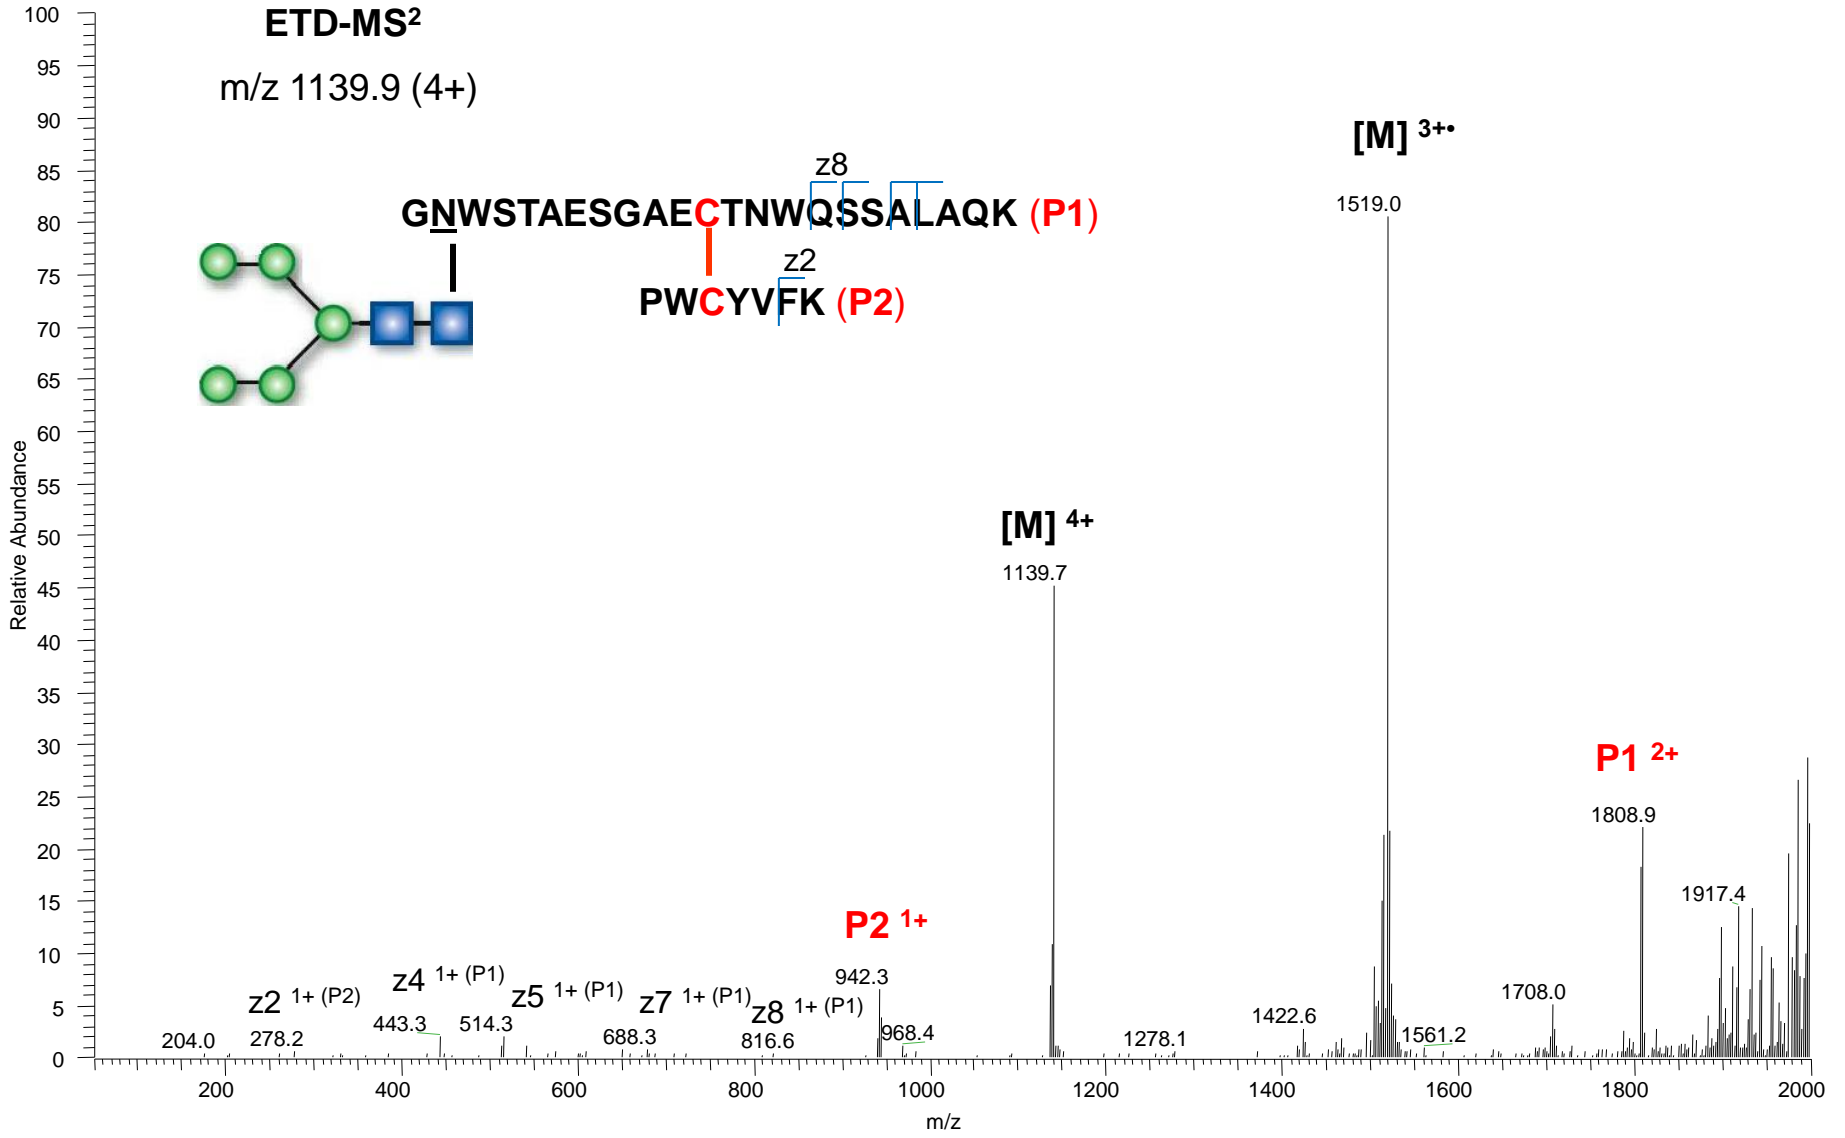

Figure S4

ETD-MS<sup>2</sup> spectrum of the disulfide-linked tryptic peptide (Lys-C plus trypsin) with N-linked glycosylation site after deglycosylation

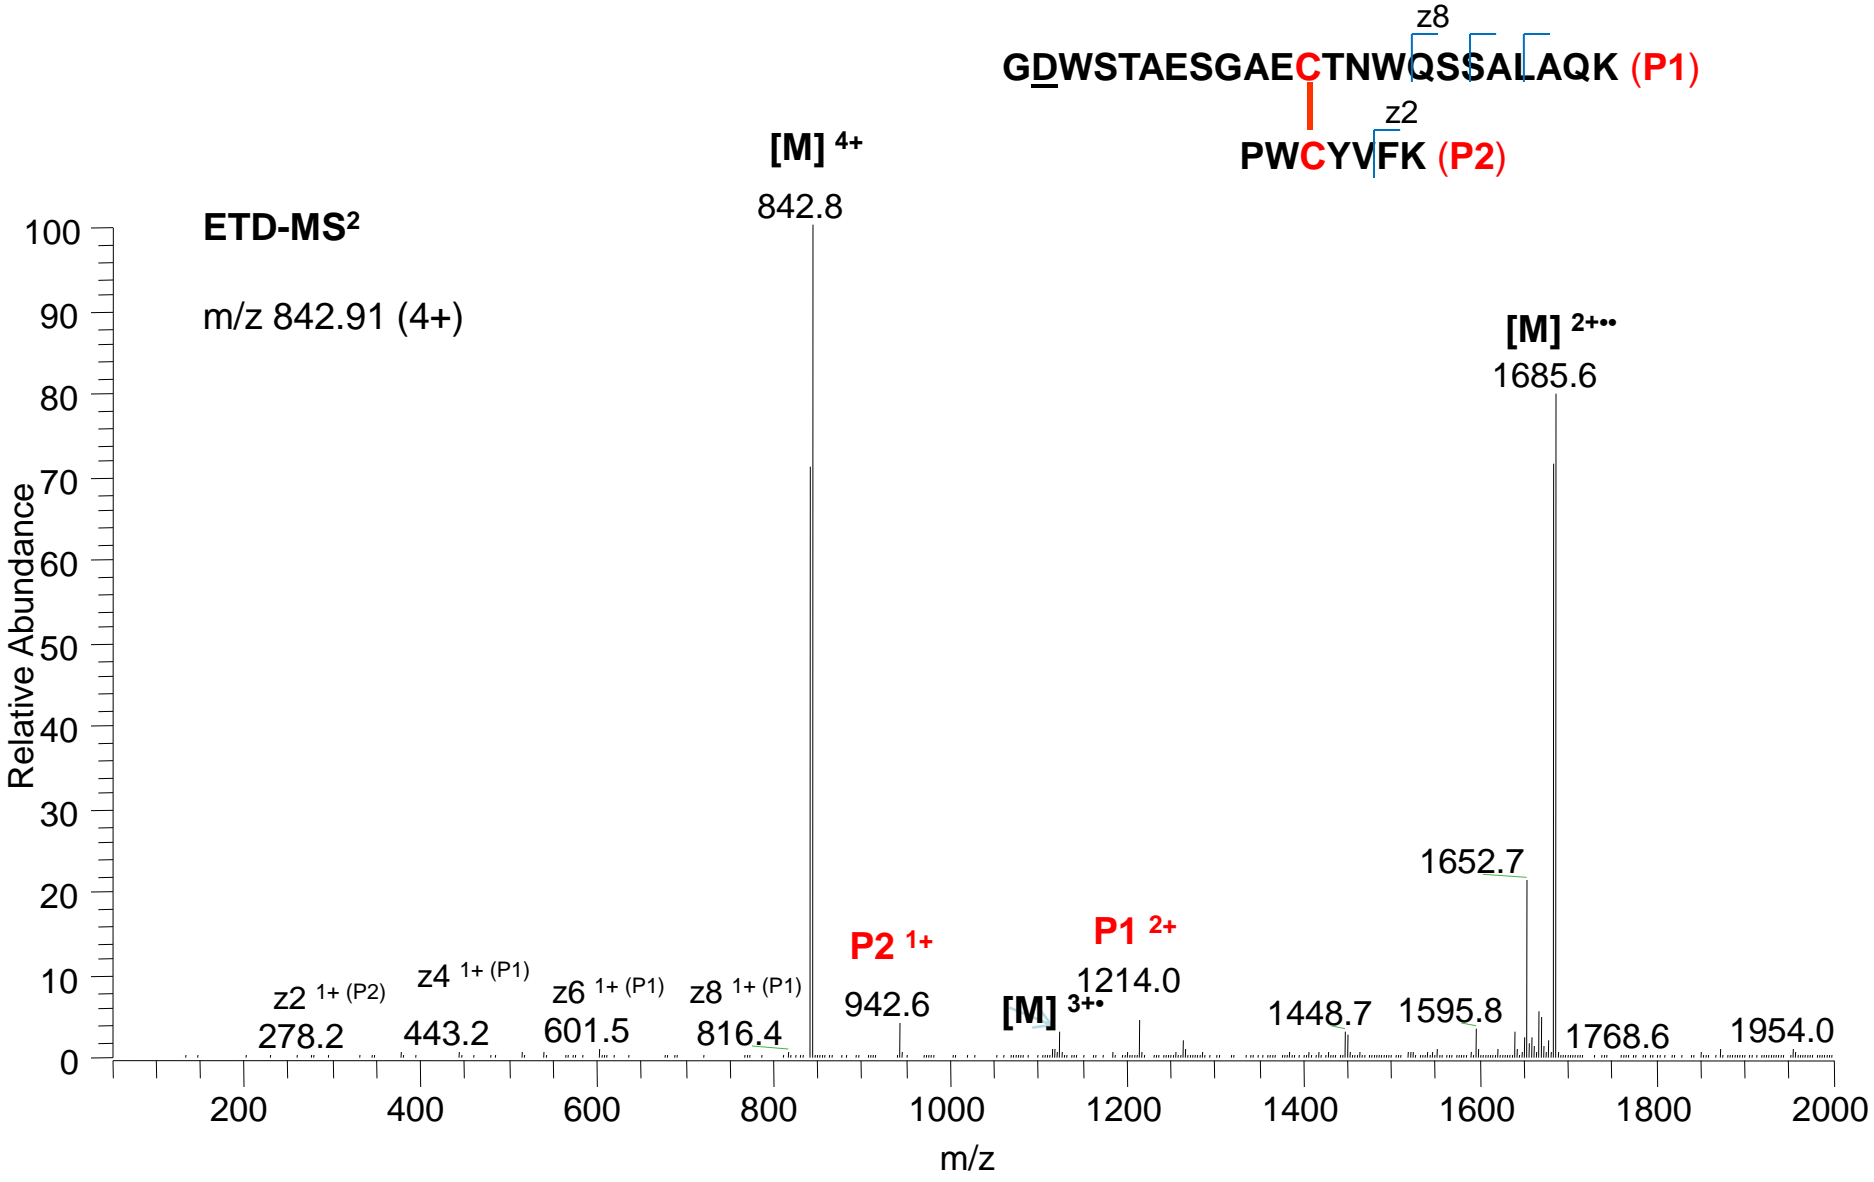

Figure S5

CID-MS<sup>3</sup> spectrum of the partially dissociated disulfide-linked peptide (P2-P3-P4) derived from the ETD fragmentation in Figure 6

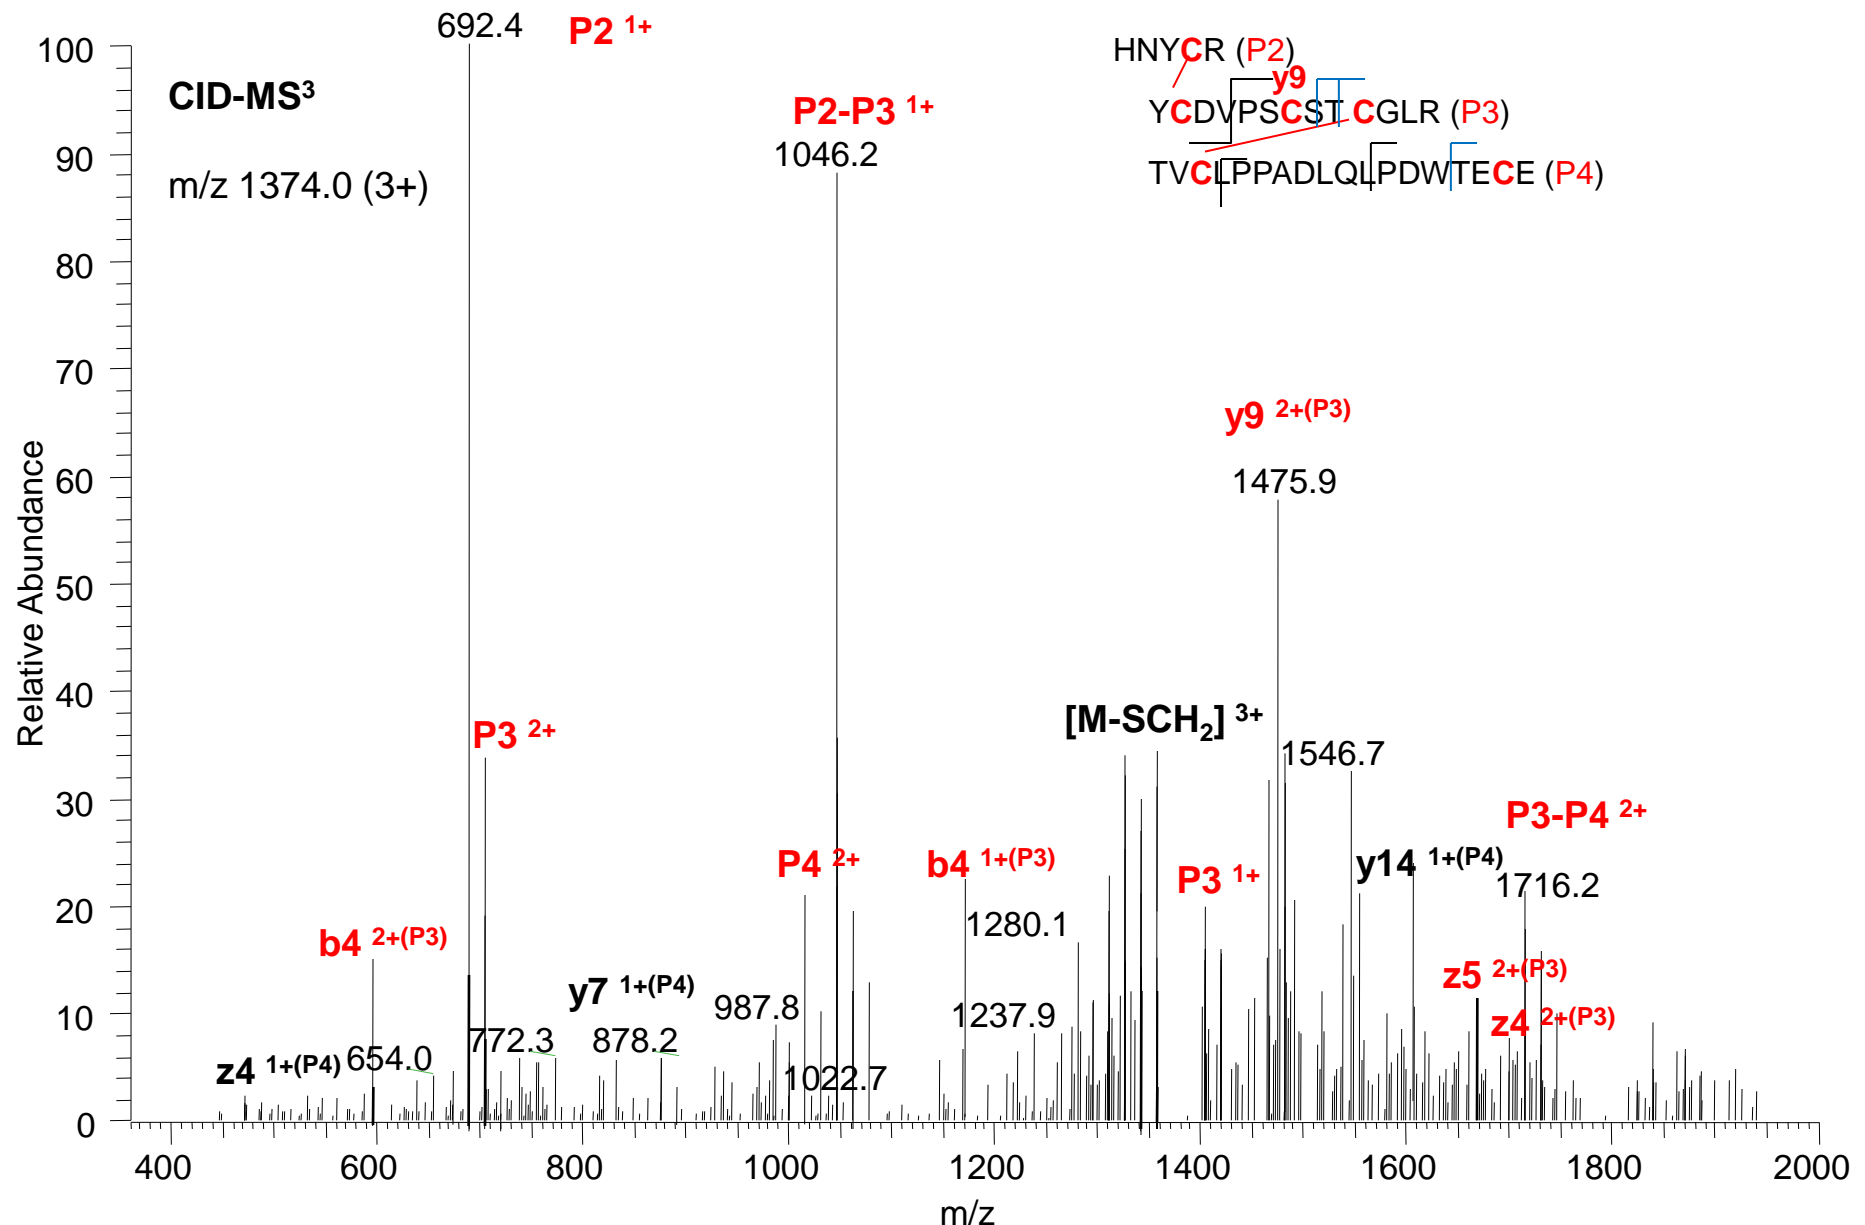

Figure S6

CID-MS<sup>3</sup> spectrum of the partially dissociated disulfide-linked peptide (P4-P5-P6) derived from the ETD fragmentation in Figure 6

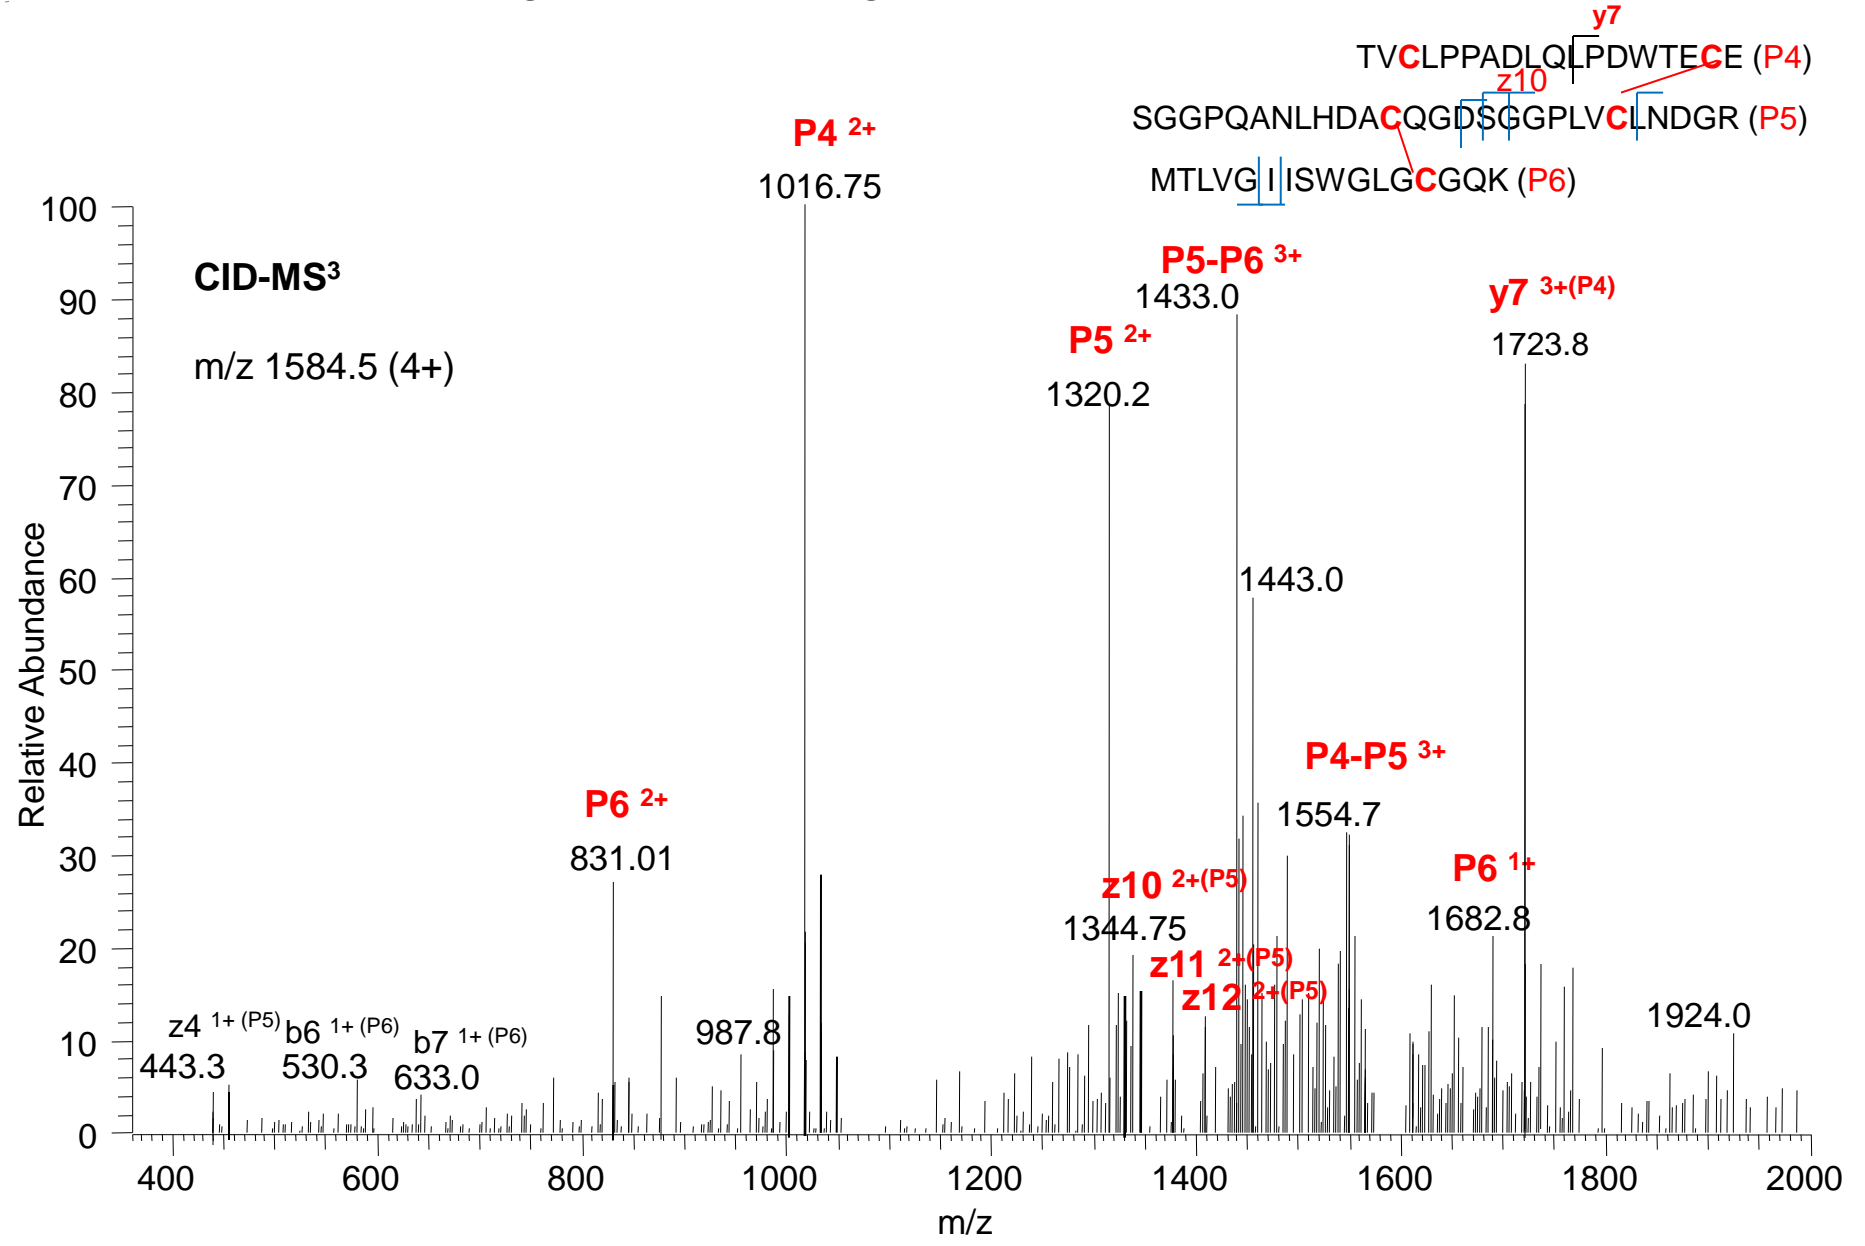

Supplement: NIHMS207369-supplement-1_si_001.pdf [file NIHMS207369-supplement-1_si_001.pdf]
